## 1 Lower Soil Carbon Loss Due to Persistent Microbial Adaptation to Climate Warming

2  
3 Xue Guo<sup>1, 2, 3, #</sup>, Qun Gao<sup>1, 2, 3, #</sup>, Mengting Yuan<sup>4, #</sup>, Gangsheng Wang<sup>2, 3, #</sup>, Xishu Zhou<sup>2, 3, 5</sup>, Jiajie  
4 Feng<sup>2, 3</sup>, Zhou Shi<sup>2, 3</sup>, Lauren Hale<sup>2, 3</sup>, Linwei Wu<sup>2, 3</sup>, Aifen Zhou<sup>2, 3</sup>, Renmao Tian<sup>2, 3</sup>, Feifei Liu<sup>2,</sup>  
5 <sup>3</sup>, Bo Wu<sup>2, 3, 6</sup>, Lijun Chen<sup>2</sup>, Chang Gyo Jung<sup>7</sup>, Shuli Niu<sup>8, 9</sup>, Dejun Li<sup>10, 11</sup>, Xia Xu<sup>12</sup>, Lifen Jiang<sup>7</sup>,  
6 Arthur Escalas<sup>2, 3</sup>, Liyou Wu<sup>2, 3</sup>, Zhili He<sup>2, 3, 6, 13</sup>, Joy D. Van Nostrand<sup>2, 3</sup>, Daliang Ning<sup>2, 3</sup>, Xueduan  
7 Liu<sup>5</sup>, Yunfeng Yang<sup>1</sup>, Edward. A.G. Schuur<sup>7</sup>, Konstantinos T. Konstantinidis<sup>14</sup>, James R. Cole<sup>15</sup>,  
8 C. Ryan Penton<sup>16, 17</sup>, Yiqi Luo<sup>3, 7, 18</sup>, James M. Tiedje<sup>15</sup>, and Jizhong Zhou<sup>1, 2, 3, 19, 20,\*</sup>

9  
10 <sup>1</sup>State Key Joint Laboratory of Environment Simulation and Pollution Control, School of  
11 Environment, Tsinghua University, Beijing, China; <sup>2</sup>Institute for Environmental Genomics,  
12 University of Oklahoma, Norman, Oklahoma, USA; <sup>3</sup>Department of Microbiology and Plant  
13 Biology, University of Oklahoma, Norman, Oklahoma, USA; <sup>4</sup>Department of Environmental  
14 Science, Policy, and Management, University of California, Berkeley, California, USA; <sup>5</sup>School  
15 of Minerals Processing and Bioengineering, Central South University, Changsha, Hunan, China;  
16 <sup>6</sup>Environmental Microbiomics Research Center and School of Environmental Science and  
17 Engineering, Sun Yat-sen University, Guangzhou, China; <sup>7</sup>Center for Ecosystem Science and  
18 Society, Department of Biological Sciences, Northern Arizona University, Flagstaff, Arizona,  
19 USA; <sup>8</sup>Institute of Geographic Sciences and Natural Resources Research, Chinese Academy of  
20 Sciences, Beijing, China; <sup>9</sup>University of Chinese Academy of Sciences, Beijing, China; <sup>10</sup>Key  
21 Laboratory of Agro-ecological Processes in Subtropical Region, Institute of Subtropical  
22 Agriculture, Chinese Academy of Sciences, Changsha, Hunan, China; <sup>11</sup>Huanjiang Observation  
23 and Research Station for Karst Ecosystem, Chinese Academy of Sciences, Huanjiang, Guangxi,  
24 China; <sup>12</sup>College of Biology and the Environment, Co-Innovation Center for Sustainable Forestry  
25 in Southern China, Nanjing Forestry University, Nanjing, China; <sup>13</sup>Southern Laboratory of Ocean  
26 Science and Engineering (Zhuhai), Zhuhai, China; <sup>14</sup>School of Civil and Environmental  
27 Engineering and School of Biological Science, Georgia Institute of Technology, Atlanta, Georgia,  
28 USA; <sup>15</sup>Center for Microbial Ecology, Michigan State University, East Lansing, Michigan, USA;  
29 <sup>16</sup>College of Letters and Sciences, Faculty of Science and Mathematics, Arizona State University,  
30 Mesa, AZ, USA; <sup>17</sup>Center for Fundamental and Applied Microbiomics, Biodesign Institute,  
31 Arizona State University, Tempe, AZ, USA; <sup>18</sup>Department of Earth System Science, Tsinghua  
32 University, Beijing, China; <sup>19</sup>School of Civil Engineering and Environmental Sciences, University

33 of Oklahoma, Norman, Oklahoma, USA; <sup>20</sup>Earth and Environmental Sciences, Lawrence Berkeley  
34 National Laboratory, Berkeley, California, USA

35

36 **\*Corresponding authors: Dr. Jizhong Zhou**

37 Phone : 405.325.6073 ; Fax : 405-325-7552 ; E-mail: [jzhou@ou.edu](mailto:jzhou@ou.edu)

38 #These authors contributed equally to this work.

39 **Abstract**

40  
41 Soil microbial respiration is an important source of uncertainty in projecting future climate and  
42 carbon (C) cycle feedbacks. Despite intensive studies for two decades, the magnitude, direction,  
43 and duration of such feedbacks are uncertain, and their underlying microbial mechanisms are still  
44 poorly understood. Here we examined the responses of soil respiration and microbial community  
45 structure to long-term experimental warming in a temperate grassland ecosystem. Our results  
46 indicated that the temperature sensitivity of soil microbial respiration (i.e.,  $Q_{10}$ ) persistently  
47 decreased by  $12.0 \pm 3.7\%$  across 7 years of warming. Integrated metagenomic and functional  
48 analyses showed that microbial community adaptation played critical roles in regulating  
49 respiratory acclimation. Incorporating microbial functional gene abundance data into a  
50 microbially-enabled ecosystem model significantly improved the modeling performance of soil  
51 microbial respiration by 5–19%, compared to the traditional non-microbial model. Model  
52 parametric uncertainty was also reduced by 55–71% when gene abundances were used. In addition,  
53 our modeling analyses suggested that decreased temperature sensitivity could lead to considerably  
54 less heterotrophic respiration ( $11.6 \pm 7.5\%$ ), and hence less soil C loss. If such microbially mediated  
55 dampening effects occur generally across different spatial and temporal scales, the potential  
56 positive feedback of soil microbial respiration in response to climate warming may be less than  
57 previously predicted.

## 58 Introduction

59  
60 Soil stores large quantities of organic carbon (C), about three times more C than the Earth's  
61 atmosphere<sup>1,2</sup>. Soil respiration is the largest single source of carbon dioxide (CO<sub>2</sub>) from terrestrial  
62 ecosystems to the atmosphere, whose magnitude is about ten times larger than anthropogenic  
63 emissions<sup>3</sup>. Soil total respiration ( $R_t$ ) includes both autotrophic respiration ( $R_a$ ) from plant root  
64 growth and root biomass maintenance, and heterotrophic respiration ( $R_h$ ) from microbial  
65 decomposition of litter and soil organic matter (SOM). Various short-term experiments show that  
66 soil respiration increases exponentially with temperature<sup>4</sup>, which has been used as a general  
67 relationship to parameterize ecosystem and Earth System Models (ESMs)<sup>5</sup>. If the near-exponential  
68 short-term relationship of soil respiration and temperature holds for the long-term (years to  
69 decades), climate warming will trigger a sharp increase in ecosystem respiration. Such an increase  
70 could then result in a strong positive feedback to the global C cycle<sup>6</sup>, which is dependent on the  
71 responses of  $R_h$  and the dynamics of detrital inputs under warming<sup>7</sup>. Therefore, it is particularly  
72 important to accurately evaluate soil  $R_h$  and its response to climate warming. However, partitioning  
73  $R_t$  into  $R_a$  and  $R_h$  is one of the main challenges in both experiment- and model-based global change  
74 research<sup>8</sup>. Consequently, soil respiration is a poorly understood key C flux in the global C cycle  
75 and is an important source of the uncertainty in climate projections<sup>9-11</sup>.

76  
77 Microorganisms can dramatically adjust their respiratory responses to temperature over long terms  
78 (years) via changing their metabolism and community structure<sup>12</sup>. Several climate change  
79 experiments demonstrated that soil respiration was stimulated in the short term, followed by a  
80 dampened effect of warming later<sup>13-15</sup>. This phenomenon is referred to as respiratory acclimation.  
81 The existence of respiratory acclimation is of critical importance as the greater the global  
82 respiratory acclimation, the weaker the positive feedback between climate warming and ecosystem  
83 CO<sub>2</sub> release<sup>16</sup>. However, the existence and the degree of soil respiratory acclimation is extremely  
84 uncertain, especially in the field and over a long duration (years to decades)<sup>9,10,17</sup>. Whether  
85 respiratory acclimation can persist over time is not clear. Moreover, the mechanisms controlling  
86 soil respiratory acclimation have been intensively debated<sup>4,14,17-19</sup>, and include warming-induced  
87 substrate depletion<sup>17,19</sup> or evolutionary adaptation via changes in microbial community<sup>13,14</sup>. These  
88 two mechanisms may lead to different soil C loss in a warmer world<sup>14,19</sup>. While the former could

89 lead to a depletion of labile C pools, releasing more C into the atmosphere through microbial  
90 respiration if more plant-derived C is available under warming, the latter could result in less soil  
91 labile C loss due to microbial community adaptation to the rising temperature (warming)<sup>14</sup>.  
92 Therefore, knowledge about microbial respiratory acclimation and its underlying mechanisms will  
93 be central to making better predictions of terrestrial C cycling feedbacks. However, one grand  
94 challenge in climate change biology is to integrate microbial community information, particularly  
95 omics information, into ecosystem models to improve their predictive ability for projecting future  
96 climate and environmental changes<sup>20</sup>. More specifically, parameter values for various microbial  
97 processes are poorly constrained by experimental observations, which becomes one of the  
98 significant uncertainty sources leading to low confidence in carbon-climate feedback projections  
99<sup>21</sup>. Hence, using omics-enabled experimental observations to improve model parameter  
100 estimations could greatly help to refine the projected magnitude of the carbon-climate feedbacks.

101  
102 Soil microbial communities are very complex in structure and are sensitive to changes in  
103 environmental conditions<sup>14</sup>, so information obtained from a single time point provides only a  
104 snapshot of the microbial community, and is not suitable for ecosystem model simulation. To  
105 modeling microbial respiratory responses to climate warming, long-term experiments under more  
106 realistic field-settings with time-series microbial data are needed. Otherwise, it will be difficult to  
107 determine the direction, magnitude, and duration of biospheric feedbacks to climate change<sup>15,22</sup>.  
108 Therefore, a new warming experiment site with sandy soil and dominance of C<sub>3</sub> grasses was  
109 established in a native, tall-grass prairie ecosystem of the US Great Plains in Central Oklahoma  
110 (34° 59' N, 97° 31' W) in July 2009<sup>23</sup>. Soil samples archived every year right after the continuous  
111 warming by infrared radiators (+3 °C) were analyzed by integrated metagenomics technologies.

112  
113 In this study, we examined the temperature responses of soil  $R_h$  (> 7 years) and their underlying  
114 mechanisms. Our main objectives were to answer the following questions: (i) How does long-term  
115 experimental warming affect the temperature responses of soil microbial respiration over time? (ii)  
116 Whether or not acclimation of microbial respiration occurs persistently across years under  
117 warming and by what underlying mechanisms? (iii) Can the microbial mechanisms underlying soil  
118 respiration be incorporated into ecosystem models to improve model performance and reduce  
119 model uncertainty? We hypothesize that soil microbial respiratory acclimation exists persistently

120 over the long-term and that microbial community adaptation plays critical roles in regulating such  
121 respiratory acclimation. If true, incorporating metagenomics-based microbial functional  
122 information will significantly increase confidence in model simulations and therefore improve  
123 model predictions.

124

## 125 **Results and discussion**

126

127 **Overall ecosystem changes under long-term warming.** The plots in the warming experiment  
128 site have been subjected to continuous warming for over 7 years<sup>7</sup>. On average, experimental  
129 warming significantly ( $p < 0.01$ ) increased daily air temperature by 1.3 °C, and daily mean soil  
130 temperature at 7.5 cm by 2.8 °C (Fig. 1a). Experimental warming significantly ( $p < 0.01$ ) decreased  
131 soil moisture by 6.4% (Fig. 1b). Consistent with previous reports<sup>14</sup>, warming significantly ( $p =$   
132 0.01) shifted plant community structure. Specifically, C<sub>3</sub> plant biomass was significantly ( $p < 0.01$ )  
133 lower under warming than control, but no significant change was observed in C<sub>4</sub> and total plant  
134 biomass (Fig. S1a), which results in a plant community shift towards relatively more C<sub>4</sub> plants.  
135 Although the statistical test is not significant, the gross primary production (GPP) was slightly  
136 increased by warming (Fig. 1c). Meanwhile, the net ecosystem exchange (NEE) was higher under  
137 warming than control due to lower ecosystem respiration (ER), suggesting that the whole  
138 ecosystem acted as a C sink under the climate warming scenario (Fig. 1c). In addition, no overall  
139 differences were detected in total organic C (TOC), total nitrogen (TN) and soil pH (Fig. S1b and  
140 c), but the amount of NO<sub>3</sub><sup>-</sup> was significantly higher under warming than control (Fig. S1c). These  
141 alterations in ecosystem variables by warming are expected to lead to changes in soil respirations  
142 and microbial community functions.

143

144 **Temperature sensitivity of soil microbial respiration under warming.** Soil surface CO<sub>2</sub> efflux  
145 was measured by using shallow (2-3cm) PVC collars for  $R_t$  and deep (70cm) PVC tubes for  $R_h$ ,  
146 with the differences between  $R_t$  and  $R_h$  calculated as  $R_a$  (Fig. S2 and Methods). Warming  
147 significantly ( $p < 0.01$ ) stimulated  $R_h$  by 8.0–28.1% across all years, which is consistent with  
148 results from a filter paper decomposition experiment that showed significantly ( $p < 0.01$ ) higher  
149 decomposition rates under warming (Fig. 1e). However, warming appeared to suppress  $R_a$ ,  
150 although it was not statistically significant (Fig. 1d), which may result from the decreased root

151 activities along warming-induced plant community shift<sup>7</sup>. More than half of  $R_t$  (58% and 65% for  
152 the control and warming plots) was from heterotrophic respiration, indicating that soil microbial  
153 community greatly contribute to soil CO<sub>2</sub> efflux<sup>14</sup>. No significant decline of  $R_h/R_t$  ratio was  
154 observed in warmed and control plots through time, suggesting that soil C input in the form of  
155 plant litter may substantially contribute to the stability of soil C when plant roots were excluded.  
156 Due to the opposing responses of  $R_a$  and  $R_h$  to warming,  $R_t$  exhibited no significant change by  
157 warming across all years (Fig. 1d). Since our main interest is the response of microbial litter and  
158 SOM decomposition to warming, we primarily focused on  $R_h$  for the majority of the following  
159 analyses.

160  
161 To examine the apparent temperature sensitivity ( $Q_{10}$ ) of microbial respiration, the measured field  
162  $R_h$  data in each year were fitted to the  $Q_{10}$ -based exponential equation<sup>4</sup> (see Methods). Significant  
163 ( $p < 0.05$ ) or marginally significant ( $p < 0.10$ ) apparent  $Q_{10}$  estimates were observed under both  
164 control and warming treatments in all years except 2011 (Table S1). In average, the apparent  $Q_{10}$   
165 estimates were significantly ( $p = 0.03$ ) higher under control ( $1.61 \pm 0.06$ ) than warming ( $1.41 \pm$   
166  $0.07$ ), suggesting a  $12.0 \pm 3.7\%$  decrease in the temperature sensitivity of soil  $R_h$  across 7 years of  
167 warming (Fig. 1f). However, the apparent temperature sensitivity estimate based on the field  
168 measurements are influenced by various other factors beyond temperature, including soil moisture,  
169 plants-derived substrate quality and availability, nutrient limitation influencing microbial enzyme  
170 production, experimental duration, and/or spatial heterogeneity, as well as uncertainty in  
171 instrumental measurements<sup>4,8</sup>.

172  
173 To further delineate the intrinsic temperature sensitivity of SOM decomposition, ecosystem  
174 model-based inverse analysis was performed to untangle various complex soil processes<sup>8,14,18</sup>  
175 using the Microbial-ENzyme Decomposition (MEND) model (Fig. S3a), which has been evaluated  
176 from laboratory to global scale<sup>24-26</sup>. By fitting all 7-year respiration data together, the model-based  
177 intrinsic  $Q_{10}$  under warming was  $1.39 \pm 0.09$ , significantly lower ( $p < 0.01$ ) than that under control  
178 ( $1.77 \pm 0.12$ ) (Fig. 1f). The intrinsic  $Q_{10}$  values from our model-data fusion approach were  
179 comparable with the measured apparent  $Q_{10}$  under both control and warming. Altogether, the above  
180 results indicate that there was a strong and persistent acclimation of heterotrophic respiration under  
181 warming over the last 7 years.

182

183 **Mechanisms of the persistent decrease in temperature sensitivity of microbial respiration.**

184 The persistent decrease in temperature sensitivity of soil microbial respiration across different  
185 years under warming could be due to substrate depletion under warming. It has been argued that  
186 soil labile C becomes depleted by increased respiration in response to warming, which leads to a  
187 subsequent reduction in the rate of soil respiration<sup>10</sup>. In this study, several lines of evidence suggest  
188 that the decreased temperature sensitivity of microbial respiration was unlikely due to substrate  
189 depletion. First, GPP and NEE were similar or higher under warming than control (Fig. 1c),  
190 suggesting that soil C input as plant litter and root exudates should be similar or even higher under  
191 warming than control. Also, our BIOLOG results revealed that microbial metabolism underpinning  
192 the utilization ability of most labile substrates were considerably higher under warming than  
193 control (Fig. S4). The measured mean annual soil C from 2010 to 2016 remained unchanged (Fig.  
194 S1c), which do not support the expectation garnered from the substrate depletion hypothesis. These  
195 results suggested that the reduced temperature sensitivity of soil respiration appears to be less  
196 likely due to substrate depletion.

197

198 The adaptive changes in microbial community composition and functional structure could also  
199 lead to the reduced temperature sensitivity of microbial respiration. To test this hypothesis, soil  
200 microbial communities of individual samples from 2010 to 2016 were all analyzed with deep  
201 amplicon sequencing of the 16S rRNA gene for bacteria and archaea, and the ITS for fungi,  
202 metagenomic shotgun sequencing, and functional gene arrays (GeoChip 5.0; Table S2).  
203 Permutational multivariate analysis revealed that experimental warming significantly shifted  
204 microbial community taxonomic and functional structure (Table 1). These shifts were tightly  
205 linked to environmental factors, such as soil temperature, soil moisture, pH and climate conditions  
206 as revealed by the Mantel test (Fig. 2a and S5) and canonical correspondence analyses (CCA) (Fig.  
207 S6). Interestingly, considerably less unexplained community variations were obtained based on  
208 GeoChip data (59.2%) than 16S (73.0%), ITS (77.4%) and shotgun sequencing data (73.3%) (Fig.  
209 S7), indicating that GeoChip-based detection could be more effective to catch the community  
210 dynamics in response to the changes in plant diversity, soil conditions, and time. In addition,  
211 structural equation modeling (SEM)-based analysis indicated that soil temperature, moisture and



212 drought index could strongly affect soil  $R_h$  by altering microbial functional diversity and structure  
213 (Fig. 2b).

214

215 Warming-induced shifts of microbial functional diversity and structure led to significant changes  
216 of biogeochemical cycling processes, including C cycling (e.g., C degradation, C fixation) and  
217 nutrient-cycling processes (e.g., N fixation, denitrification, nitrification), phosphorus utilization  
218 and sulfur metabolism. Overall, the total abundance of biogeochemical cycling genes significantly  
219 ( $p < 0.05$ ) stimulated by warming were considerably higher (58%~80%) than those significantly  
220 inhibited by warming (20%~42%) in all years except 2015 (Fig. 2c), although the interannual  
221 variations of environmental factors greatly influenced the composition of biogeochemical cycling  
222 genes. Similar pattern was also observed in microbial functional genes involved in C degradation  
223 (Fig. S8a), including those important for degrading starch (e.g., *amyA* encoding  $\alpha$ -amylase),  
224 hemicellulose (e.g., *ara* encoding arabinofuranosidase), cellulose (e.g., cellobiase), chitin (e.g.,  
225 chitinase) and vanillin/lignin (e.g., *mnp* encoding manganese peroxidase). More specifically,  
226 larger numbers of individual genes involved in degrading various soil organic carbon were  
227 significantly increased by warming (95% confidence interval; Fig. 2d and Fig. S9) in most of the  
228 years, despite that warming effects on these C-degrading genes substantially changed across  
229 different years. The significant enrichment of C-degrading genes under warming may potentially  
230 enhance soil C degradation. In addition, the total abundances of warming-stimulated genes  
231 involved in N cycling (e.g., N fixation, denitrification, and nitrification), phosphorus utilization,  
232 and sulfur metabolism were higher than those of warming-inhibited genes in most of the years  
233 (Fig. 2d and Fig. S8b-d), suggesting that the rates of nutrient-cycling processes could be stimulated  
234 by warming. Further analyses by CCA and Mantel test revealed that most of the genes important  
235 to C degradation and nutrient cycling had strong correlations to the  $R_h$ ,  $R_t$ , and  $Q_{10}$  (Table S3 and  
236 S4), indicating that these functional genes are important in controlling the dynamics of soil  
237 respirations. In general, GeoChip hybridization data exhibited stronger correlations to various  
238 functional parameters than shotgun sequencing data, particularly for the heterotrophic  $Q_{10}$  (Table  
239 S3 and S4). All the above results indicated that the changes of microbial community composition  
240 and function are crucial for the reduced temperature sensitivity of soil  $R_h$  under long-term  
241 experimental warming.

242

243 **Incorporating microbial functional gene information into ecosystem models.** Due to the  
244 importance of microbes in controlling soil  $R_h$ , as an exploratory effort, we further attempted to  
245 incorporate omics data into ecosystem models. Since traditional ecosystem models do not  
246 explicitly represent most microbial processes<sup>27</sup>, the MEND model was employed, which explicitly  
247 represents microbial physiology and SOM decomposition catalyzed by oxidative or hydrolytic  
248 enzymes<sup>26</sup>. Because MEND model requires absolute quantitative information on hydrolytic and  
249 oxidative enzymes for SOM decomposition<sup>26,28</sup>, GeoChip hybridization-based data were used,  
250 which is more effective to catch the community dynamic changes as illustrated above.

251  
252 The MEND model was calibrated with or without functional gene information. We referred the  
253 former to as gene amended MEND (gMEND) and the latter as traditional MEND (tMEND). We  
254 constrained gMEND by achieving the highest correlation between MEND-modeled mean annual  
255 enzyme concentrations and GeoChip-detected annual oxidative and hydrolytic gene abundances  
256 in addition to a best fit between observed and simulated  $R_h$ . Our results showed high correlations  
257 ( $r = 0.74$  and  $0.81$  for oxidative and hydrolytic enzymes, respectively) between simulated enzyme  
258 concentrations and GeoChip-detected gene abundances (Fig. S10a-b) in the control plots. Also,  
259 relatively low Mean Absolute Relative Errors (MARE = 14% and 22%, Fig. S10c-d) were also  
260 achieved between simulated and expected enzyme concentrations under warming conditions,  
261 which were the product of simulated enzyme concentrations under control and the warming-to-  
262 control ratio of GeoChip-detected gene abundances. The above modeling results indicated good  
263 agreements on the 7-year interannual variabilities between simulated enzyme concentrations and  
264 GeoChip-detected gene abundances. Furthermore, almost all of 11 model parameters were better  
265 constrained by gMEND than by tMEND (Fig. 3a and Fig. S11). The average coefficient of  
266 variation (CV) of model parameters was significantly reduced from 77% (tMEND) to 22%  
267 (gMEND) under control and from 39% (tMEND) to 17% (gMEND) under warming. In addition,  
268 the MEND-simulated  $R_h$  agreed well with the observed  $R_h$  under warming and control (Fig. 3b:  $R^2$   
269 = 0.53 and 0.63, respectively). Compared to non-microbial terrestrial ecosystem model (TECO)<sup>29</sup>,  
270 the MEND model improved CO<sub>2</sub> efflux fitting by 5% under control and by 19% under warming  
271 (Fig. S12). Finally, the MEND-derived intrinsic  $Q_{10}$  values were confined from 1.20–2.42  
272 (tMEND) to a more reasonable range of 1.27–2.13 (gMEND), as  $Q_{10}$  values below 2 are preferred  
273 for better global C cycle modeling<sup>30</sup>. The intrinsic  $Q_{10}$  values also concurred with previous site-

274 level and global-scale studies <sup>30,31</sup>. The  $Q_{10}$  in the MEND model solely reflects the microbial  
275 responses to temperature change, which can remove confounding effects of other environmental  
276 factors. Compared to the apparent  $Q_{10}$  estimated by the relationship between  $R_h$  and soil  
277 temperature, the MEND-derived  $Q_{10}$  better represents the intrinsic temperature effects on  
278 microbially-mediated SOM decomposition processes, which provides a significant advance in our  
279 understanding of microbial responses to changes in temperature. Therefore, the MEND-derived  
280 intrinsic  $Q_{10}$  was further used to explore how much C loss is reduced by the soil microbial  
281 acclimation ( $Q_{10}$ ) under warming. Our results showed that the microbial acclimation in the  
282 warming plots would reduce  $11.6 \pm 7.5\%$  soil  $R_h$ , and thus reduce soil C loss, during the 7-year  
283 experimental period, compared to the scenarios without acclimation (Fig. 4).

284

## 285 **Conclusions**

286 Through field measurements and process model-based simulations, our results demonstrated that  
287 soil microbial respiratory acclimation persisted over the last 7 years, which is consistent with a  
288 recent long-term study on a forest ecosystem <sup>15</sup>. This study provides explicit, robust evidence of  
289 the persistence of soil microbial respiratory acclimation to warming-induced rising temperature  
290 and reducing moisture over long periods. If this phenomenon holds over larger spatial scales across  
291 different ecosystems, soil microbial respiratory acclimation globally may have a greater mitigating  
292 impact than expected on climate warming-induced CO<sub>2</sub> losses <sup>32</sup>. If the results from this study are  
293 applicable to other grasslands globally <sup>33</sup>, the microbial acclimation could lead to  $0.49 \pm 0.31$  Pg  
294 ( $10^{15}$  g) less C loss per year (see Online Methods). Our study also reveals that warming-induced  
295 respiratory acclimation is significantly correlated with the adaptive changes in microbial  
296 community functional structure, which could dampen the potential positive C-climate feedbacks  
297 by reducing considerable amount of warming-induced heterotrophic respiration. In addition,  
298 although incorporating complex microbial information into global change models is extremely  
299 challenging <sup>20</sup>, by parameterizing the microbial model with omics-based functional gene  
300 information, the uncertainty of key model parameters in MEND was substantially decreased, and  
301 its performance was considerably improved compared to non-microbial model. Thus, it is possible  
302 to improve the model predictive ability for projecting future environmental changes via better  
303 assessment of microbial omics-based functional capacities. However, to generalize whether these  
304 microbial mechanisms and metagenomics-enabled modeling strategy obtained in this grassland

305 ecosystem are applicable to other ecosystems requires further long-term studies under realistic  
306 field settings.

307

## 308 **Materials and methods**

309 **Site Description and Sampling.** This experimental site was established in July 2009 at the Kessler  
310 Atmospheric and Ecological Field Station (KAEFS) in the US Great Plains in McClain County, Oklahoma  
311 (34° 59' N, 97° 31' W)<sup>14,34</sup>. Experimental design and site description were described in detail previously<sup>23</sup>.  
312 Briefly, *Ambrosia trifida*, *Solanum carolinense* and *Euphorbia dentate* belonging to C<sub>3</sub> forbs, and *Tridens*  
313 *flavus*, *Sporobolus compositus* and *Sorghum halapense* belonging to C<sub>4</sub> grasses are dominant in the site<sup>23,34</sup>.  
314 Annual mean temperature is 16.3 °C and annual precipitation is 914 mm, based on Oklahoma  
315 Climatological Survey data from 1948 to 1999. The soil type of this site is Port–Pulaski–Keokuk complex  
316 with 51% of sand, 35% of silt and 13% of clay, which is a well-drained soil that is formed in loamy sediment  
317 on flood plains. The soil has a high available water holding capacity (37%), neutral pH and 1.2 g cm<sup>-3</sup> bulk  
318 density with 1.9% total organic matter and 0.1% total nitrogen (N)<sup>23,34</sup>. Four blocks were used in the field  
319 site experiment, in which warming is a primary factor. Two levels of warming (ambient and +3 °C) were  
320 set for four pairs of 2.5 m × 1.75 m plots by utilizing a “real” or “dummy” infrared radiator (Kalglo  
321 Electronics, Bethlehem, PA, USA). In the warmed plots, a real infrared radiator was suspended 1.5 m above  
322 the ground, and the dummy infrared radiator was suspended to simulate a shading effect of the device in  
323 the control plots.

324 In this study, eight surface (0-15 cm) soil samples, four from the warmed and four from the control  
325 plots, were collected annually at approximately the date of peak plant biomass (September or October) from  
326 2010 to 2016. Three soil cores (2.5 cm diameter x 15 cm depth) were taken by using a soil sampler tube in  
327 each plot and composited to have enough samples for soil chemistry, microbiology and molecular biology  
328 analyses. A total of 56 soil samples were analyzed in this study.

329

330 **Environmental and soil chemical measurements.** Precipitation data were obtained from the Oklahoma  
331 Mesonet Station (Washington Station)<sup>34</sup> located 200 m away from our experiment site, and 12-month  
332 version of the standardized precipitation-evapotranspiration index (SPEI-12) was used as annual drought  
333 index<sup>35,36</sup>. Air temperature, soil temperature and volumetric soil water content were measured as previously  
334 described<sup>23</sup>.

335 All soil samples were analyzed to determine soil total organic carbon (TOC), total nitrogen (TN), soil  
336 nitrate (NO<sub>3</sub><sup>-</sup>) and ammonia (NH<sub>4</sub><sup>+</sup>) by the Soil, Water, and Forage Analytical Laboratory at Oklahoma  
337 State University (Stillwater, OK, USA). Soil pH was measured using a pH meter with a calibrated combined  
338 glass electrode<sup>37</sup>.

339  
340 **Aboveground plant communities.** Aboveground plant community investigations were annually conducted  
341 at peak biomass (usually September) as described previously<sup>34,38</sup>. Aboveground plant biomass, separated  
342 into C<sub>3</sub> and C<sub>4</sub> species, was indirectly estimated by a modified pin-touch method<sup>34,38</sup>. Detailed description  
343 of biomass estimation is provided by Sherry *et al.*<sup>39</sup>. All of the species in plant community within each plot  
344 were identified to estimate species richness.

345  
346 **Ecosystem C fluxes and soil respirations.** Ecosystem C fluxes and soil respirations were measured once  
347 or twice a month between 10:00 and 15:00 (local time) from January 2010 to December 2016 as described  
348 previously<sup>14,34</sup>. One square aluminum frame (0.5 m x 0.5 m) was inserted in the soil at 2 cm depth in each  
349 plot to provide a flat base between the soil surface and the CO<sub>2</sub> sampling chamber. Net ecosystem exchange  
350 (NEE) and ecosystem respiration (ER) were measured using LI-6400 portable photosynthesis system (LI-  
351 COR)<sup>40</sup>. Gross primary productivity (GPP) was estimated as the difference between NEE and ER.  
352 Meanwhile, soil surface respiration was monthly measured using a LI-8100A soil flux system attached to  
353 a soil CO<sub>2</sub> flux chamber (LI-COR). Measurements were taken above a PVC collar (80 cm<sup>2</sup> in area and 5  
354 cm in depth) and a PVC tube (80 cm<sup>2</sup> in area and 70 cm in depth) in each plot. The PVC tube cut off old  
355 plant roots and prevented new roots from growing inside the tube. Any aboveground parts of living plants  
356 were removed from the PVC tubes and collars before each measurement. The CO<sub>2</sub> efflux measured above  
357 the PVC tubes represented heterotrophic respiration ( $R_h$ ) from soil microbes, while that measured above the  
358 PVC collars represented soil total respiration ( $R_t$ ) including heterotrophic and autotrophic respiration ( $R_h$   
359 and  $R_a$ ) from soil microbes and plant root respectively.

360  
361 **Soil decomposition rate.** Weighted cellulose filter paper (Whatman CAT No. 1442-090) was placed into  
362 fiberglass mesh bags and placed vertically at 0-10 cm soil depth in each plot in March 2016. All of  
363 decomposition bags were collected back in September 2016, rinsed and dried at 60 °C for weighing. The  
364 percentage of mass loss was calculated to represent soil decomposition rate.

365  
366 **Molecular analyses of soil samples**  
367 **a. BIOLOG analysis.** The C substrate utilization patterns of soil microbial communities in 2016 were  
368 analyzed by BIOLOG EcoPlate™ (BIOLOG). The BIOLOG EcoPlate™ contains 31 of the most useful  
369 labile carbon sources for soil community analysis, which are repeated 3 times in each plate. In this study,  
370 the plates with diluted soil supernatant (0.5g soil with 45 mL 0.85% NaCl) were incubated in a BIOLOG  
371 OmniLog PM System at 25 °C for 4.5 days. The color change of each well was shown as absorbance curve.

372 The net area under the absorbance versus time curve was calculated to represent physiological activity of  
373 various C sources<sup>41</sup>. The average value from 3 replicates was used for analyses in this study.

374

375 **b. DNA extraction, amplicon sequencing and analysis.** Methods for DNA extraction from soil and  
376 amplicon sequencing of all soil samples were as previously described<sup>23</sup>. Briefly, 10 ng DNA per sample  
377 were used for library construction and amplicon sequencing<sup>42</sup>. The V4 region of bacterial and archaeal 16S  
378 rRNA genes and fungal ITSs between 5.8S and 28S rRNA genes were amplified with primer sets  
379 515F/806R and ITS7F/ITS4R, and sequenced on a MiSeq platform (Illumina, Inc.) using 2 x 250 pair-end  
380 sequencing kit. Raw sequences were submitted to our Galaxy sequence analysis pipeline  
381 (<http://zhoulab5.rccc.ou.edu:8080>) to further analyze as previously described<sup>23</sup>. Finally, OTUs were  
382 clustered by UPARSE<sup>43</sup> at 97% identity for both 16S rRNA gene and ITS. All sequences were randomly  
383 resampled to 30,000 sequences for 16S rRNA gene and 10,000 sequences for ITS per sample.  
384 Representative sequences of OTUs were annotated taxonomically by the Ribosomal Database Project (RDP)  
385 Classifier with 50% confidence estimates<sup>44</sup>.

386

387 **c. GeoChip analysis.** GeoChip 5.0M, a functional gene array<sup>45</sup>, was used for all 56 samples from 2010 to  
388 2016. GeoChip hybridization, scanning and data processing were performed as described previously<sup>45</sup>. The  
389 raw signals from NimbleGen were submitted to the Microarray Data Manager on our website  
390 (<http://ieg.ou.edu/microarray>), cleaned, normalized and analyzed using the data analysis pipeline. Briefly,  
391 spot signal-to-noise ratio and minimum intensity cutoff were used as standard to remove unreliable spots.  
392 Both the universal standard and functional gene spot intensities were used to normalize the signals among  
393 arrays<sup>45</sup>.

394

395 **d. Shotgun sequencing analysis.** Metagenomic library of all samples was prepared using a KAPA Hyper  
396 Prep Kit and sequenced at the Oklahoma Medical Research Foundation's Genomics Core using the Illumina  
397 HiSeq 3000 platform with a 2 x 150 bp paired-end kit. A total of 8.18 billion reads were obtained from all  
398 56 samples, and 80 million reads were randomly resampled from each sample to perform data processing.  
399 Functional gene prediction, annotation and treatment analyses were performed using methods similar to  
400 those described in previous study<sup>45</sup>. Meanwhile, all reads were also submitted to our EcoFUN-MAP  
401 pipeline (<http://www.ou.edu/ieg/tools/data-analysis-pipeline.html>) to fish out shotgun sequence reads of  
402 important environmental functional genes used to fabricate GeoChip as described previously<sup>46</sup>. The web  
403 based pipeline application of EcoFUN-MAP can be accessed with request.

404

405 **Model simulations (TECO and MEND model)**

406  
407 **a. Data sources.** Daily GPP values were obtained from a corrected 8-day GPP product based on the MODIS  
408 GPP (MOD17A2/MOD17A2H)<sup>47</sup>. We assign the same daily GPP values for the 8-day period. Meanwhile,  
409 data sets measured in both control and warmed plots across all years were also used for model simulations,  
410 including soil temperature and moisture, heterotrophic respiration, and the GeoChip-detected enzyme  
411 densities.

412  
413 **b. Apparent  $Q_{10}$  estimation.** To examine temperature sensitivity of microbial heterotrophic respirations,  
414 the measured field  $R_h$  in warmed and control plots was fitted with the exponential equation<sup>4</sup> (Equation (1))  
415 on yearly basis or across all years. In the equation,  $R$  is  $R_h$ ,  $T$  is soil temperature,  $R(T_{ref})$  is the respiration  
416 rate at the reference temperature ( $T_{ref}$ ). The  $Q_{10}$  estimated by the observed respiration data was called  
417 apparent  $Q_{10}$  of respiration in this study.

$$418 \quad R(T) = R(T_{ref}) \times Q_{10}^{(T-T_{ref})/10} \quad (1)$$

419

420 **c. Intrinsic  $Q_{10}$  estimation.** In the MEND model, the parameter  $Q_{10}$  is used to characterize the  
421 unconfounded temperature sensitivity of SOM decomposition and heterotrophic respiration. Constrained  
422  $Q_{10}$  were obtained for the control and warming plots by incorporating respiration and microbial information  
423 into the MEND model parameterization process, which we called the intrinsic  $Q_{10}$  of soil respirations<sup>30</sup>.

424  
425 **d. TECO model.** The non-microbial terrestrial ecosystem (TECO) model is a variant of the CENTURY  
426 model<sup>48</sup> that is designed to simulate C input from photosynthesis, C transfer among plant and soil pools,  
427 and respiratory C releases to the atmosphere (Fig. S3b). C dynamics in the TECO model can be described  
428 by a group of first-order ordinary differential equations, where the turnover rates are modified by soil  
429 temperature ( $T$ ) and moisture ( $W$ )<sup>29</sup>. Prior ranges of turnover rates were based on Weng and Lu<sup>49</sup>. The prior  
430 ranges of  $Q_{10}$  were based on the ranges of apparent  $Q_{10}$  of  $R_h$  per treatment<sup>4</sup>. We assumed that the parameters  
431 distributed uniformly in their *prior* ranges<sup>8</sup>. We used the Shuffled Complex Evolution (SCE) algorithm to  
432 determine model parameters<sup>26</sup>. We also applied the probabilistic inversion (Markov Chain Monte Carlo) to  
433 quantify parameter uncertainties<sup>50</sup>. By performing TECO modeling, daily heterotrophic respiration was  
434 simulated for both warmed and control plots from 2010 to 2016. The coefficient of determination ( $R^2$ ) was  
435 used to estimate the model performance between observed and simulated respiration<sup>51</sup>.

436  
437 **e. Microbial-ENzyme Decomposition (MEND) model**

438

439 **e.1. MEND model description.** The Microbial-ENzyme Decomposition (MEND) model (Fig. S3a)  
440 describes the SOM decomposition processes by explicitly representing relevant microbial and enzymatic  
441 physiology<sup>26</sup>. The SOM pool consists of two particulate organic matter (POM) pools and one mineral-  
442 associated organic matter (MOM) pool. The two POMs are decomposed by oxidative and hydrolytic  
443 enzymes, respectively. The MOM is decomposed by a generic enzyme group (EM). Model state variables,  
444 governing equations, component fluxes and parameters are described in Table S6–S9, respectively. A  
445 model parameter (reaction rate) in MEND may be modified by soil water potential, temperature, or pH<sup>26,52</sup>.  
446 MEND represents microbial dormancy, resuscitation, and mortality and enzymatic decomposition in  
447 response to changes in moisture, as well as shifting of microbial and enzymatic activities with changing  
448 temperature<sup>25</sup>. The temperature response functions are described by the Arrhenius equation (characterized  
449 by the activation energy) or the  $Q_{10}$  method<sup>53</sup>, where the  $Q_{10}$  method was used in this study.

450  
451 **e.2. Model Parameterization.** The model parameters are determined by achieving high goodness-of-fits  
452 of model simulations against experimental observations, such as heterotrophic respiration ( $R_h$ ), microbial  
453 biomass carbon (MBC), gene abundances of oxidative (EnzCo) and hydrolytic enzymes (EnzCh) in this  
454 study (Table S10). We implemented multi-objective calibration of the model<sup>25</sup>. Each objective evaluates  
455 the goodness-of-fit of a specific observed variable, e.g.,  $R_h$ , MBC, or gene abundances (Table S10). Note  
456 that the GeoChip gene abundances were used to constrain the MEND modeling as additional objective  
457 functions. The parameter optimization is to minimize the overall objective function ( $J$ ) that is computed as  
458 the weighted average of multiple single-objectives (Table S9)<sup>26</sup>

459 
$$J = \sum_{i=1}^m w_i \cdot J_i \quad (2a)$$

460 
$$\sum_{i=1}^m w_i = 1 \text{ with } w_i \in [0,1] \quad (2b)$$

461 Where  $m$  denotes the number of objectives and  $w_i$  is the weighting factor for the  $i^{\text{th}}$  ( $i = 1, 2, \dots, m$ ) objective  
462 ( $J_i$ ). In this study,  $J_i$  ( $i=1, 2, 3, 4$ ) refers to the objective function value for  $R_h$ , MBC, EnzCo, and EnzCh,  
463 respectively.

464 As the overall objective function  $J$  is minimized in the parameter optimization process, the individual  
465 objective function  $J_i$  may be calculated as  $(1 - R^2)$ ,  $(1 - r)$ , or  $MARE$ :

466 
$$R^2 = 1 - \frac{\sum_{i=1}^n [Y_{sim}(i) - Y_{obs}(i)]^2}{\sum_{i=1}^n [Y_{obs}(i) - \bar{Y}_{obs}]^2} \quad (3)$$

468



$$MARE = \frac{1}{n} \sum_{i=1}^n \left| \frac{Y_{sim}(i) - Y_{obs}(i)}{Y_{obs}(i)} \right| \quad (4)$$

$$r = \frac{\sum_{i=1}^n [Y_{obs}(i) - \bar{Y}_{obs}] \cdot [Y_{sim}(i) - \bar{Y}_{sim}]}{\sqrt{\sum_{i=1}^n [Y_{obs}(i) - \bar{Y}_{obs}]^2} \cdot \sqrt{\sum_{i=1}^n [Y_{sim}(i) - \bar{Y}_{sim}]^2}} \quad (5)$$

469  
470  
471 where  $R^2$  denotes the Coefficient of Determination<sup>26,54</sup>. The  $R^2$  quantifies the proportion of the variance in  
472 the response variables that is predictable from the independent variables. A higher  $R^2$  ( $R^2 \leq 1$ ) indicates  
473 better model performance.  $MARE$  is the Mean Absolute Relative Error (MARE) and lower  $MARE$  values  
474 ( $MARE \geq 0$ ) are preferred<sup>26,55</sup>.  $MARE$  represents the averaged deviations of predictions ( $Y_{sim}$ ) from their  
475 observations ( $Y_{obs}$ ).  $r$  is Pearson correlation coefficient and higher  $r$  values ( $|r| \leq 1$ ) means better model  
476 performance.  $n$  is the number of data;  $Y_{obs}$  and  $Y_{sim}$  are observed and simulated values, respectively; and  
477  $\bar{Y}_{obs}$  and  $\bar{Y}_{sim}$  are the mean value for  $Y_{obs}$  and  $Y_{sim}$ , respectively.

478 Different objective functions are used to quantify the goodness-of-fit for different variables (Table S9),  
479 depending on the measurement method and frequency of variables. The  $R^2$  is used to evaluate the variables  
480 (e.g., soil respiration) that are frequently measured and the absolute values can be directly compared  
481 between observations and simulations. The  $MARE$  is used to evaluate the variables (e.g., microbial biomass  
482 and enzyme concentrations) with only a few measurements and the absolute values can be directly  
483 compared. When the absolute values cannot be directly compared, the correlation coefficient ( $r$ ) between  
484 original or transformed (e.g., logarithmic transformed) observations and simulations will be used. For  
485 example, the gene abundances from metagenomics or GeoChip analysis cannot be directly compared to the  
486 enzyme concentrations or activities in the MEND model. However, we may assume correlation could be  
487 found between the measured and modeled values with a certain transformation or normalization.

488 We used the Shuffled Complex Evolution (SCE) algorithm to determine model parameters for the  
489 control soil and the warming soil respectively. SCE is a stochastic optimization method that includes  
490 competitive evolution of a ‘complex’ of points spanning the parameter space and the shuffling of complexes  
491<sup>56</sup>.

492  
493 **e.3. Uncertainty quantification.** The parameter uncertainty in the MEND model was quantified by the  
494 Critical Objective Function Index (COFI) method<sup>26,52</sup>. The COFI method is based on a global stochastic  
495 optimization technique (e.g., SCE in this study). It also accounts for model complexity (represented by the  
496 number of model parameters) and observational data availability (represented by the number of  
497 observations). The confidence region of parametric space were determined by selecting those parameter  
498 sets resulting in objective function values ( $J$ ) less than the COFI value ( $J_{cr}$ ) from the feasible parameter  
499 space<sup>26,52</sup>.

500

501 **e.4. Estimation of warming-induced soil C loss and acclimation effect.** To examine how much soil C  
502 loss is reduced by the soil microbial respiratory acclimation under warming, we further calculated  
503 heterotrophic respiration ( $R_h$ ) under warming without acclimation (w/o Acclimation). That is, we estimated  
504 the mean  $R_h$  changing with soil temperature that under warming, however, we kept the same range of  $Q_{10}$   
505 as that under control<sup>13,15</sup>. The  $R_h$  changing with soil temperature is described by the  $Q_{10}$  method similar to  
506 Eq. (1):

$$507 \quad R_h(T) = R_h(T_{ref}) \times Q_{10}^{(T-T_{ref})/10} \quad (6)$$

508 where  $R_h(T)$  and  $R_h(T_{ref})$  are the  $R_h$  ( $\text{g C m}^{-2} \text{ d}^{-1}$ ) at soil temperature ( $T$ ) and reference temperature ( $T_{ref}$ ),  
509 respectively; and  $T_{ref} = 10 \text{ }^\circ\text{C}$  in this study.

510 We quantified the acclimation effect by taking into account the uncertainties in intrinsic  $Q_{10}$   
511 estimated by the MEND model. First we calculated the  $R_h$  fluxes ( $\text{g C m}^{-2} \text{ d}^{-1}$ ) at the mean annual soil  
512 temperature under control, i.e.,  $R_h^{CT}$  under  $T = 17 \text{ }^\circ\text{C}$  and  $Q_{10} = 1.77$  with 95% confidence interval (CI) of  
513 1.70–2.13. Second we calculated  $R_h$  under warming with acclimation ( $R_h^{wAC}$  under  $T = 20 \text{ }^\circ\text{C}$  and  $Q_{10} = 1.39$   
514 with 95% CI of 1.27–1.59) and  $R_h$  under warming without acclimation ( $R_h^{woAC}$  under  $T = 20 \text{ }^\circ\text{C}$  and  $Q_{10} =$   
515 1.77 with 95% CI of 1.70–2.13). We then calculated the reduction in  $R_h$  due to acclimation as

$$516 \quad \Delta R_h^{woAC-wAC} = R_h^{woAC} - R_h^{wAC} \quad (7)$$

517 Finally, we calculated the acclimation effect as the percent reduction in  $R_h$  due to acclimation relative  
518 to the baseline  $R_h$ , i.e., the mean  $R_h$  in the control plot ( $R_h^{CT}$ )

$$519 \quad \% \Delta R_h = \Delta R_h^{woAC-wAC} / R_h^{CT} \times 100\% \quad (8)$$

520

521 As a preliminary test of global significance, we extrapolated our results to the world's grasslands:

522 The annual soil respiration flux ( $R_s$ ) was  $8.0 \text{ Pg C yr}^{-1}$  in the global grasslands (area =  $1.11 \times 10^7 \text{ km}^2$ )  
523 with the MODIS land cover map in 2009 according to Adachi et al.<sup>33</sup>, which meant  $R_s = 720.7 \text{ g C m}^{-2} \text{ yr}^{-1}$ .  
524

525 We then estimated the heterotrophic respiration flux  $R_h = 381.7 \text{ g C m}^{-2} \text{ yr}^{-1}$  and  $R_h / R_s = 53\%$  in global  
526 grasslands based on the relationship between  $R_h$  and  $R_s$  (in units of  $\text{g C m}^{-2} \text{ yr}^{-1}$ ) described by Bond-Lamberty  
527 & Thomson<sup>57</sup>:

$$528 \quad \ln(R_h) = 0.22 + 0.87 \ln(R_s) \quad (9)$$

529 Based on the ratio  $R_h / R_s = 53\%$ , the annual heterotrophic respiration flux from global grasslands was  
530 estimated as  $4.2 \text{ Pg C yr}^{-1}$ .

531 We then estimated the acclimation effect as follows. Our results show that  $\% \Delta R_h = 11.6 \pm 7.5\%$  (Fig.  
532 4c), which means the reduction in  $R_h$  due to acclimation accounted for  $11.6 \pm 7.5\%$  of  $R_h^{CT}$ . If this percentage  
533 is applicable to the global grasslands, the warming acclimation would result in less  $R_h$  by  $0.49 \pm 0.31$  Pg C  
534  $\text{yr}^{-1}$  ( $= 4.2 \text{ Pg C yr}^{-1} \times (11.6 \pm 7.5\%)$ ).

535  
536 **Statistical analysis.** All statistical analyses were carried out using R software 3.1.1 with the package vegan  
537 <sup>58</sup> (v.2.3-5) and pgrmness <sup>59</sup> (v.1.5.8) unless otherwise indicated. The difference of various variables between  
538 warming and control was tested by repeated-measures analysis of variance (ANOVA). The non-parametric  
539 multivariate analysis of variance (Adonis) were used to test the difference of microbial community  
540 taxonomic and functional structures considering the blocked split-plot design <sup>23</sup>. CCA and Mantel test were  
541 performed to examine the linkage between environmental variables and microbial community  
542 structure/subcategories of functional genes. The significance of the CCA model was tested by analysis of  
543 variance (ANOVA). CCA-based variation partitioning analysis (VPA) was performed to evaluate how  
544 much different types of environmental variables influences microbial community phylogenetic and  
545 functional structures <sup>14</sup>. Structural equation model (SEM) was used to explore how warming-induced  
546 environmental variables affected soil microbial communities and heterotrophic respiration. Response ratio  
547 was used to compute the effects of warming on functional genes involved in C cycling and nutrient-cycling  
548 processes from GeoChip data using the formula as previously described <sup>46</sup>. The non-parametric Kruskal-  
549 Wallis method <sup>59</sup> was used to test the significance of difference in model parameter values or the  $R_h$  under  
550 different scenarios at a significance level of 0.05.

551  
552 **Data and code availability.** DNA sequences of 16S rRNA gene and ITS amplicons were available in NCBI  
553 Sequence Read Archive under project no. PRJNA331185. Raw shotgun metagenomic sequences are  
554 deposited in the European Nucleotide Archive (<http://www.ebi.ac.uk/ena>) under study no. PRJNA533082.  
555 GeoChip signal intensity data can be accessed through the URL  
556 (<https://www.ou.edu/ieg/publications/datasets>). MEND model code and data are accessible at  
557 (<https://github.com/wanggangsheng/MENDokw.git>). All other relevant data are available in Supplementary  
558 Information or from the corresponding author upon request.

559  
560 **Acknowledgement**

561 We are grateful to the numerous former laboratory members for their help in maintaining the  
562 experimental site. We thank Drs. Xiangming Xiao, Xiaocui Wu, and Rajen Bajgain at University  
563 of Oklahoma for providing data support. This study is funded by the US Department of Energy,

564 Office of Science, Genomic Science Program under Award Number DE-SC0004601 and DE-  
565 SC0010715, and the Office of the Vice President for Research at the University of Oklahoma.  
566 X.G., Q.G. and X.Z. acknowledge China Scholarship Council (CSC) for support.

567

### 568 **Author contributions:**

569 All authors contributed intellectual input and assistance to this study and manuscript preparation.  
570 Research questions and experimental strategy were developed by J.Z., E.A.G.S., Y.L., K.T.K.,  
571 J.R.C., C.R.P., and J.M.T. Field management was carried out by J.F., M.Y., C.G.J., S.N., D.L.,  
572 X.X., L.J., LY.W., A.Z., F.L., B.W. and J.D.V.N. Sampling collections, DNA preparation and  
573 MiSeq sequencing analysis were carried out by X.G., L.C., and X.Z. GeoChip hybridization and  
574 shotgun sequencing analysis were performed by X.G., X.Z., and R.T. Soil chemical and substrate  
575 analyses were carried out by X.Z., L.H., A.E. and LW.W. Modeling was done by Q.G., and G.W.  
576 Various statistical analyses were carried by X.G., Z.S., and D.N. Assistance in data interpretation  
577 was provided by X.L., Y.Y., and Z.H. All data analysis and integration were guided by J.Z. The  
578 paper was written by J.Z., X.G., and Q.G. with help from G.W. Considering their contributions in  
579 terms of site management, data collection, analyses and/or integration over the last 8 years, X.G.,  
580 Q.G., M.Y., and G.W. are listed as co-first authors.

581

### 582 **Competing interests**

583 The authors declare no competing interests.

584

### 585 **References**

586

- 587 1 Scharlemann, J. P. W., Tanner, E. V. J., Hiederer, R. & Kapos, V. Global soil carbon:  
588 understanding and managing the largest terrestrial carbon pool. *Carbon Management* **5**,  
589 81-91 (2014).
- 590 2 Schmidt, M. W. I. *et al.* Persistence of soil organic matter as an ecosystem property.  
591 *Nature* **478**, 49-56 (2011).
- 592 3 Metcalfe, D. B., Fisher, R. A. & Wardle, D. A. Plant communities as drivers of soil  
593 respiration: pathways, mechanisms, and significance for global change. *Biogeosciences* **8**,  
594 2047-2061 (2011).
- 595 4 Davidson, E. A. & Janssens, I. A. Temperature sensitivity of soil carbon decomposition and  
596 feedbacks to climate change. *Nature* **440**, 165-173 (2006).
- 597 5 Friedlingstein, P. *et al.* Climate–Carbon Cycle Feedback Analysis: Results from the C4MIP  
598 Model Intercomparison. *Journal of Climate* **19**, 3337-3353 (2006).

- 599 6 Heimann, M. & Reichstein, M. Terrestrial ecosystem carbon dynamics and climate  
600 feedbacks. *Nature* **451**, 289-292 (2008).
- 601 7 Li, D., Zhou, X., Wu, L., Zhou, J. & Luo, Y. Contrasting responses of heterotrophic and  
602 autotrophic respiration to experimental warming in a winter annual-dominated prairie.  
603 *Global Change Biology* **19**, 3553-3564 (2013).
- 604 8 Zhou, X. *et al.* Concurrent and lagged impacts of an anomalously warm year on  
605 autotrophic and heterotrophic components of soil respiration: a deconvolution analysis.  
606 *New Phytologist* **187**, 184-198 (2010).
- 607 9 Hicks Pries, C. E., Castanha, C., Porras, R. C. & Torn, M. S. The whole-soil carbon flux in  
608 response to warming. *Science* **355**, 1420-1423 (2017).
- 609 10 Carey, J. C. *et al.* Temperature response of soil respiration largely unaltered with  
610 experimental warming. *Proceedings of the National Academy of Sciences* **113**, 13797-  
611 13802 (2016).
- 612 11 Cavicchioli, R. *et al.* Scientists' warning to humanity: microorganisms and climate change.  
613 *Nature Reviews Microbiology* **17**, 569-586 (2019).
- 614 12 Brown, J. H., Gillooly, J. F., Allen, A. P., Savage, V. M. & West, G. B. TOWARD A METABOLIC  
615 THEORY OF ECOLOGY. *Ecology* **85**, 1771-1789 (2004).
- 616 13 Luo, Y., Wan, S., Hui, D. & Wallace, L. L. Acclimatization of soil respiration to warming in a  
617 tall grass prairie. *Nature* **413**, 622-625 (2001).
- 618 14 Zhou, J. *et al.* Microbial mediation of carbon-cycle feedbacks to climate warming. *Nature*  
619 *Clim. Change* **2**, 106-110 (2012).
- 620 15 Melillo, J. M. *et al.* Long-term pattern and magnitude of soil carbon feedback to the  
621 climate system in a warming world. *Science* **358**, 101-105 (2017).
- 622 16 Luo, Y. Terrestrial Carbon–Cycle Feedback to Climate Warming. *Annual Review of Ecology,*  
623 *Evolution, and Systematics* **38**, 683-712 (2007).
- 624 17 Karhu, K. *et al.* Temperature sensitivity of soil respiration rates enhanced by microbial  
625 community response. *Nature* **513**, 81-84 (2014).
- 626 18 Knorr, W., Prentice, I. C., House, J. I. & Holland, E. A. Long-term sensitivity of soil carbon  
627 turnover to warming. *Nature* **433**, 298-301 (2005).
- 628 19 Hartley, I. P., Heinemeyer, A. & Ineson, P. Effects of three years of soil warming and  
629 shading on the rate of soil respiration: substrate availability and not thermal acclimation  
630 mediates observed response. *Global Change Biology* **13**, 1761-1770 (2007).
- 631 20 Treseder, K. K. *et al.* Integrating microbial ecology into ecosystem models: challenges and  
632 priorities. *Biogeochemistry* **109**, 7-18 (2012).
- 633 21 Bradford, M. A. *et al.* Managing uncertainty in soil carbon feedbacks to climate change.  
634 *Nature Clim. Change* **6**, 751-758, doi:10.1038/nclimate3071 (2016).
- 635 22 Reich, P. B. *et al.* Boreal and temperate trees show strong acclimation of respiration to  
636 warming. *Nature* **531**, 633-636 (2016).
- 637 23 Guo, X. *et al.* Climate warming leads to divergent succession of grassland microbial  
638 communities. *Nature Climate Change* **8**, 813-818 (2018).
- 639 24 Wang, K. *et al.* Modeling Global Soil Carbon and Soil Microbial Carbon by Integrating  
640 Microbial Processes into the Ecosystem Process Model TRIPLEX-GHG. *Journal of Advances*  
641 *in Modeling Earth Systems* **9**, 2368-2384 (2017).

- 642 25 Wang, G. *et al.* Soil moisture drives microbial controls on carbon decomposition in two  
643 subtropical forests. *Soil Biology and Biochemistry* **130**, 185-194 (2019).
- 644 26 Wang, G. *et al.* Microbial dormancy improves development and experimental validation  
645 of ecosystem model. *The ISME Journal* **9**, 226-237, doi:10.1038/ismej.2014.120 (2015).
- 646 27 Wieder, W. R. *et al.* Explicitly representing soil microbial processes in Earth system models.  
647 *Global Biogeochemical Cycles* **29**, 1782-1800 (2015).
- 648 28 Wang, G. *et al.* Microbial dormancy improves development and experimental validation  
649 of ecosystem model. *Isme Journal* **9**, 226-237, doi:10.1038/ismej.2014.120 (2015).
- 650 29 Shi, Z. *et al.* Experimental warming altered rates of carbon processes, allocation, and  
651 carbon storage in a tallgrass prairie. *Ecosphere* **6**, 1-16 (2015).
- 652 30 Mahecha, M. D. *et al.* Global convergence in the temperature sensitivity of respiration at  
653 ecosystem level. *Science* **329**, 838-840 (2010).
- 654 31 Zhou, X., Xu, X., Zhou, G. & Luo, Y. Temperature sensitivity of soil organic carbon  
655 decomposition increased with mean carbon residence time: Field incubation and data  
656 assimilation. *Global change biology* **24**, 810-822 (2018).
- 657 32 Liang, J. *et al.* Biotic responses buffer warming-induced soil organic carbon loss in Arctic  
658 tundra. *Global Change Biology* **24**, 4946-4959 (2018).
- 659 33 Adachi, M., Ito, A., Yonemura, S. & Takeuchi, W. Estimation of global soil respiration by  
660 accounting for land-use changes derived from remote sensing data. *Journal of*  
661 *Environmental Management* **200**, 97-104 (2017).
- 662 34 Xu, X., Sherry, R. A., Niu, S., Li, D. & Luo, Y. Net primary productivity and rain - use  
663 efficiency as affected by warming, altered precipitation, and clipping in a mixed - grass  
664 prairie. *Glob Chang Biol* **19**, 2753-2764 (2013).
- 665 35 Beguería, S., Vicenteserrano, S. M. & Angulomartínez, M. A Multiscalar Global Drought  
666 Dataset: The SPEIbase: A New Gridded Product for the Analysis of Drought Variability and  
667 Impacts. *Bulletin of the American Meteorological Society* **91**, 1351-1356 (2010).
- 668 36 Isbell, F. *et al.* Biodiversity increases the resistance of ecosystem productivity to climate  
669 extremes. *Nature* **526**, 574-577 (2015).
- 670 37 McLean, E. Soil pH and lime requirement. *Methods of soil analysis. Part 2. Chemical and*  
671 *microbiological properties*, 199-224 (1982).
- 672 38 Frank, D. A. & McNaughton, S. J. Aboveground Biomass Estimation with the Canopy  
673 Intercept Method: A Plant Growth Form Caveat. *Oikos* **57**, 57-60 (1990).
- 674 39 Sherry, R. A. *et al.* Lagged effects of experimental warming and doubled precipitation on  
675 annual and seasonal aboveground biomass production in a tallgrass prairie. *Global*  
676 *Change Biology* **14**, 2923-2936 (2008).
- 677 40 Niu, S. *et al.* Water - mediated responses of ecosystem carbon fluxes to climatic change  
678 in a temperate steppe. *New Phytologist* **177**, 209-219 (2008).
- 679 41 Guckert, J. B. *et al.* Community analysis by Biolog: curve integration for statistical analysis  
680 of activated sludge microbial habitats. *Journal of Microbiological Methods* **27**, 183-197  
681 (1996).
- 682 42 Wu, L. *et al.* Phasing amplicon sequencing on Illumina Miseq for robust environmental  
683 microbial community analysis. *BMC Microbiology* **15**, 125-137 (2015).
- 684 43 Edgar, R. C. UPARSE: highly accurate OTU sequences from microbial amplicon reads.  
685 *Nature methods* **10**, 996-998 (2013).

- 686 44 Wang, Q., Garrity, G. M., Tiedje, J. M. & Cole, J. R. Naive Bayesian classifier for rapid  
687 assignment of rRNA sequences into the new bacterial taxonomy. *Applied and*  
688 *environmental microbiology* **73**, 5261-5267 (2007).
- 689 45 Zhou, J. *et al.* High-throughput metagenomic technologies for complex microbial  
690 community analysis: open and closed formats. *MBio* **6**, e02288-02214 (2015).
- 691 46 Xue, K. *et al.* Tundra soil carbon is vulnerable to rapid microbial decomposition under  
692 climate warming. *Nature Clim. Change* **6**, 595-600 (2016).
- 693 47 Zhu, X. *et al.* Underestimates of Grassland Gross Primary Production in MODIS Standard  
694 Products. *Remote Sensing* **10**, 1771 (2018).
- 695 48 Parton, W., Schimel, D. S., Cole, C. & Ojima, D. Analysis of factors controlling soil organic  
696 matter levels in Great Plains grasslands. *Soil Science Society of America Journal* **51**, 1173-  
697 1179 (1987).
- 698 49 Weng, E. & Luo, Y. Relative information contributions of model vs. data to short- and long-  
699 term forecasts of forest carbon dynamics. *Ecological Applications* **21**, 1490-1505 (2011).
- 700 50 Xu, T., White, L., Hui, D. & Luo, Y. Probabilistic inversion of a terrestrial ecosystem model:  
701 Analysis of uncertainty in parameter estimation and model prediction. *Global*  
702 *Biogeochemical Cycles* **20**, 1-15 (2006).
- 703 51 Xu, R. Measuring explained variation in linear mixed effects models. *Statistics in Medicine*  
704 **22**, 3527-3541 (2003).
- 705 52 Wang, G. *et al.* Microbial dormancy improves development and experimental validation  
706 of ecosystem model. *The Isme Journal* **9**, 226-237 (2014).
- 707 53 Wang, G., Post, W. M., Mayes, M. A., Frerichs, J. T. & Sindhu, J. Parameter estimation for  
708 models of ligninolytic and cellulolytic enzyme kinetics. *Soil Biology and Biochemistry* **48**,  
709 28-38 (2012).
- 710 54 Devore, J. L. *Probability and Statistics for Engineering and the Sciences (7th Ed.)*  
711 (Brooks/Cole Cengage Learning, 2008).
- 712 55 Dawson, C. W., Abrahart, R. J. & See, L. M. HydroTest: a web-based toolbox of evaluation  
713 metrics for the standardised assessment of hydrological forecasts. *Environmental*  
714 *Modelling & Software* **22**, 1034-1052 (2007).
- 715 56 Duan, Q. Y., Sorooshian, S. & Gupta, V. Effective and efficient global optimization for  
716 conceptual rainfall-runoff models. *Water Resources Research* **28**, 1015-1031 (1992).
- 717 57 Bond-Lamberty, B. & Thomson, A. A global database of soil respiration data.  
718 *Biogeosciences* **7**, 1915-1926 (2010).
- 719 58 Oksanen, J. *et al.* The vegan package. *Community ecology package* **10**, 631-637 (2007).
- 720 59 Giraudoux, P. pgrimess: data analysis in ecology. *R package version 1.5.8* (2013).
- 721

722 **Table 1. Significance tests of the effects of warming and time on microbial community**  
 723 **structures with permutational multivariate analysis of variance.**

| Effects     | 16S   |              | ITS   |              | GeoChip |              | Metagenomic sequencing |              | Metagenome based EcoFUN-MAP |              |
|-------------|-------|--------------|-------|--------------|---------|--------------|------------------------|--------------|-----------------------------|--------------|
|             | F     | P            | F     | P            | F       | P            | F                      | P            | F                           | P            |
| Warming (W) | 4.200 | <b>0.001</b> | 2.314 | <b>0.001</b> | 2.505   | <b>0.026</b> | 8.059                  | <b>0.001</b> | 2.924                       | <b>0.001</b> |
| Year (Y)    | 2.432 | <b>0.001</b> | 1.595 | <b>0.001</b> | 12.216  | <b>0.001</b> | 4.398                  | <b>0.001</b> | 2.323                       | <b>0.001</b> |
| W × Y       | 1.178 | 0.092        | 1.055 | 0.224        | 1.385   | 0.092        | 1.350                  | 0.170        | 1.135                       | 0.084        |

724 Permutational multivariate analysis of variance (Adonis) was used based on Bray-Curtis  
 725 dissimilarity matrices. The two-way repeated-measures ANOVA model was set as  
 726 “dissimilarity~warming×year+block” using function adonis in R package vegan. The degree of  
 727 freedom was 1 for warming treatment, 6 for year and 39 for residuals. Significant effects ( $P \leq$   
 728 0.05) were shown in bold text. EcoFUN-MAP is a method designed for annotating metagenomic  
 729 sequences by comparing them with functional genes used to fabricate GeoChip.



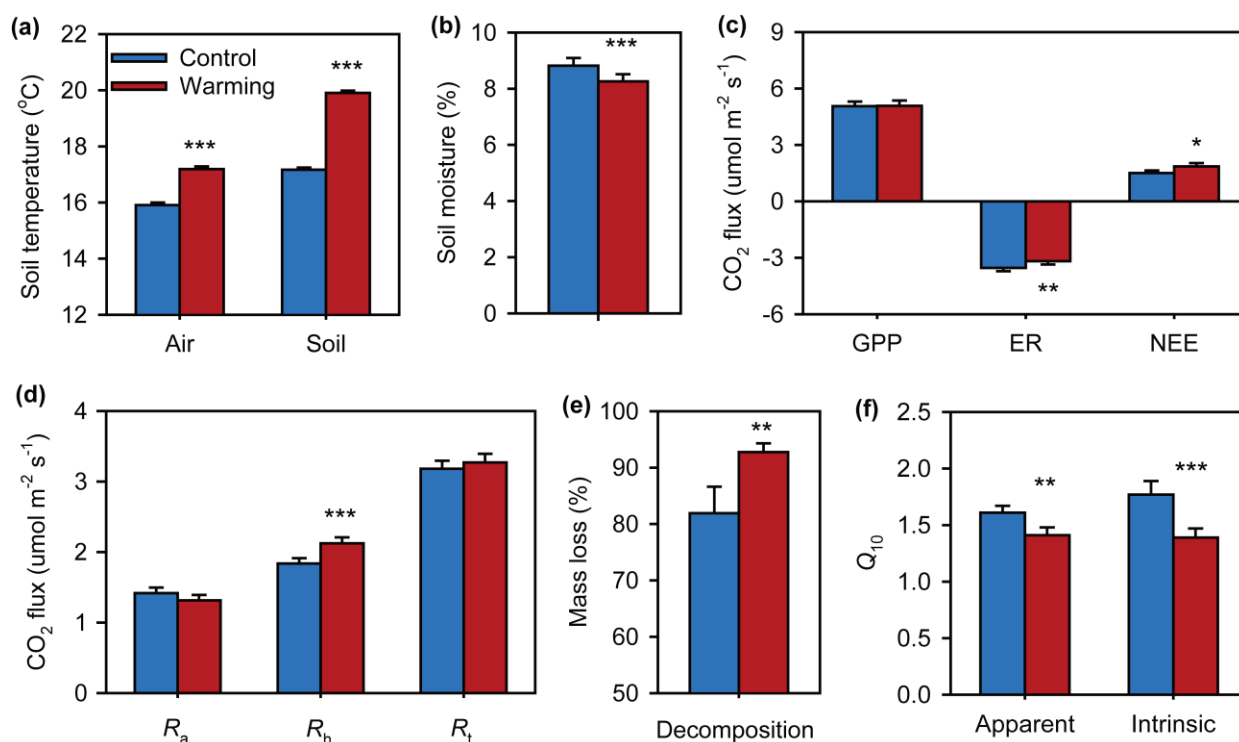

730 **Fig. 1. Warming effects on soil variables and ecosystem C fluxes.** (a) Air and soil surface (7.5 cm)  
731 temperatures averaged from 2010 to 2016. (b) Soil moisture averaged from 2010 to 2016. (c) Ecosystem C  
732 fluxes, which were estimated on the basis of the C amount from CO<sub>2</sub> emissions averaged from 2010 to  
733 2016. GPP, gross primary productivity; ER, ecosystem respiration; NEE, net ecosystem C exchange.  
734 Positive values indicate C sink, and negative values represent C source. (d) *in situ* soil respirations averaged  
735 from 2010 to 2016. R<sub>a</sub>, autotrophic respiration; R<sub>h</sub>, heterotrophic respiration; R<sub>t</sub>, soil total respiration. (e)  
736 Decomposition rate of standard cellulose filter paper (mass loss) in the field determined in 2016. (f)  
737 Apparent and intrinsic temperature sensitivity (Q<sub>10</sub>) of heterotrophic respiration (R<sub>h</sub>) averaged from 2010  
738 to 2016. Apparent Q<sub>10</sub> is estimated by fitting the curve of R<sub>h</sub> versus soil temperature based on the Q<sub>10</sub> method.  
739 Intrinsic Q<sub>10</sub> is derived by calibrating the MEND model. Error bars represent standard error of the mean.  
740 The differences between warming and control were tested by repeated measures ANOVA, indicated by \*\*\*  
741 when p < 0.01, \*\* when p < 0.05, \* when p < 0.10.

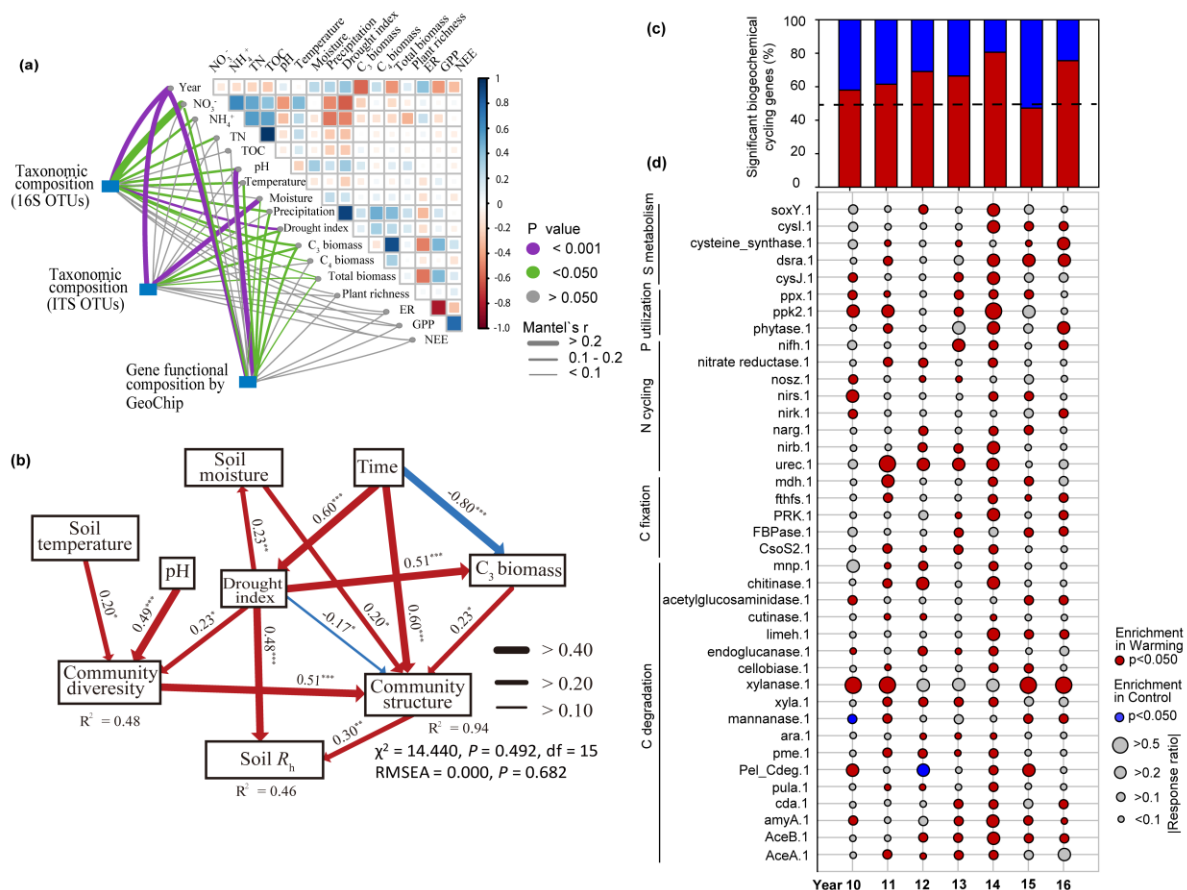

742 **Fig. 2. Feedback mechanisms of soil microbial communities to warming.** (a) Pairwise comparisons of  
 743 environmental factors with a color gradient denoting Pearson's correlation coefficients. Taxonomic (based  
 744 on 16S rRNA gene and ITS OTUs) and functional (based on GeoChip data) community structures were  
 745 related to each environmental factor by Mantel tests. Edge width corresponds to the Mantel's r statistic for  
 746 the corresponding distance correlations, and edge color denotes the statistical significance. (b) The  
 747 structural equation model (SEM) showing causal relationships among environmental factors, community  
 748 diversity (Shannon index based on GeoChip) and structure (the first axis of NMDS analysis of GeoChip  
 749 data), and heterotrophic respiration ( $R_h$ ). Red and blue arrows represent significant positive and negative  
 750 pathways, respectively. Arrow width is proportional to the strength of the relationship and bold numbers  
 751 represent the standard path coefficients, and the p values of path coefficients are indicated by \*\*\* when  $P$   
 752  $< 0.001$ , \*\* when  $P < 0.01$ , \* when  $P < 0.05$ .  $R^2$  indicates the proportion of the variance explained for each  
 753 dependent variable in the model. (c) Biogeochemical cycling genes significantly changed by warming from  
 754 2010 to 2016 according to GeoChip data. Biogeochemical cycling genes included all genes involved in C  
 755 degradation, C fixation, N cycling, phosphorus (P) utilization and sulfur (S) metabolism. Significance is  
 756 based on response ratio of each gene with 95% confidence intervals of abundance differences between  
 757 warmed and control treatments. Dash line represents that the abundance of warming-stimulated (red) genes  
 758 are in good agreement with the abundance of warming-inhibited (blue) genes. (d) Bubble plot illustrating  
 759 the enrichment of key biogeochemical cycling genes under warming (W) and control (C) treatments  
 760 according to GeoChip data. Bubble color represents the significance (p-value) of gene enrichment based on  
 761 response ratios. Bubble size represents the relative changes of gene enrichment based on response ratios.  
 762 The biogeochemical cycling processes for these genes are shown in plot, and the full names of the genes in  
 763 this plot are listed in Supplementary Table S5.

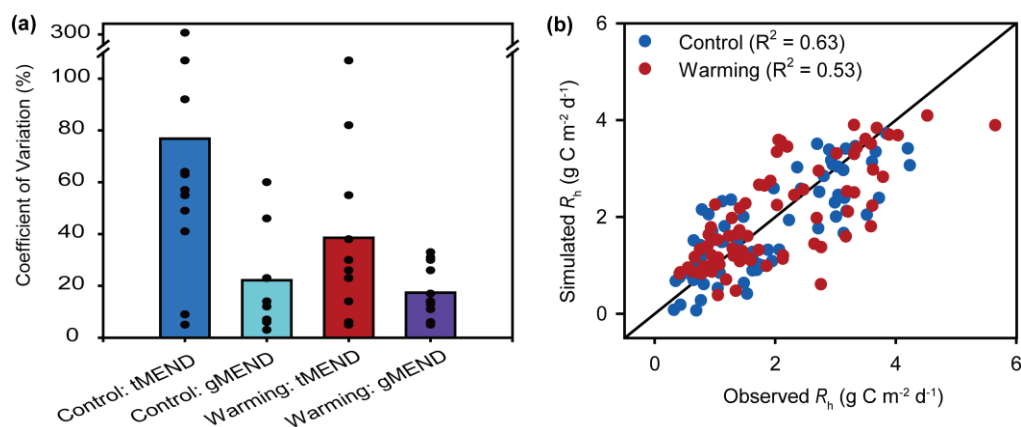

764 **Fig. 3. Model parameter uncertainty and modeling performance.** (a) The MEND model parameter  
765 uncertainty quantified by the Coefficient of Variation (CV). The bars show the mean CV values of the 11  
766 parameters (See Supplementary Fig. S11 and Table S8 for detailed description). The dots along each bar  
767 show the CV for each parameter. “tMEND” refers to the traditional MEND model parameterization without  
768 gene abundances data. “gMEND” denotes the improved MEND parameterization with gene abundances.  
769 (b) Comparison between gMEND-simulated and observed heterotrophic respiration ( $R_h$ ) under control and  
770 warming ( $R^2$  denotes the coefficient of determination).

771  
772

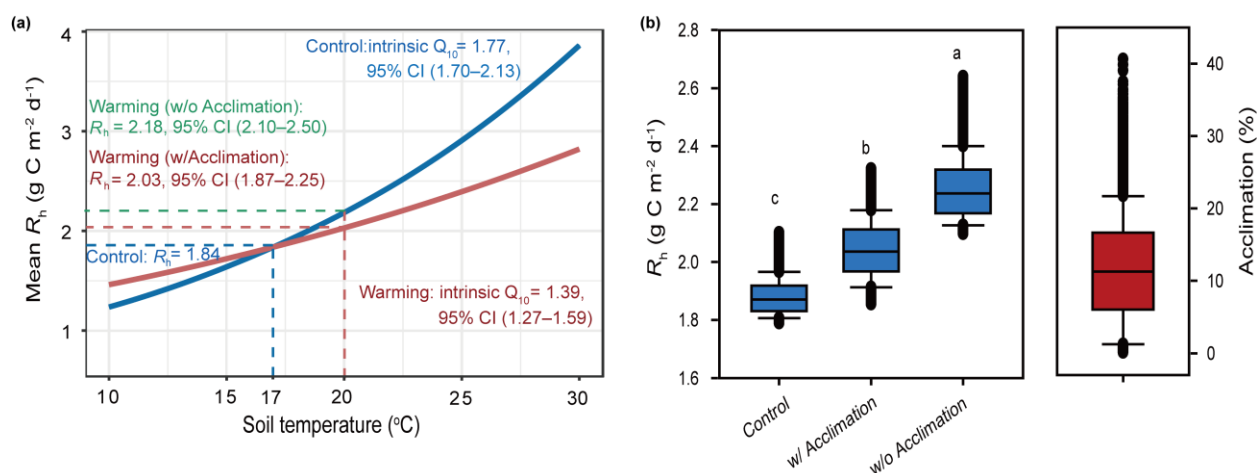

773 **Fig 4. Warming-induced microbial acclimation of heterotrophic respiration ( $R_h$ ) based on**  
 774 **MEND-estimated intrinsic  $Q_{10}$ .** (a)  $R_h$  acclimation based on the mean values. The mean annual soil  
 775 temperature ( $T$ ) during 2010–2016 was 17 °C and 20 °C under control and warming, respectively. The  
 776 average intrinsic  $Q_{10} = 1.77$  under control and 1.39 under warming. The mean baseline  $R_h = 1.84$  g C m<sup>-2</sup>  
 777 d<sup>-1</sup> under control ( $T = 17$  °C). The average  $R_h = 2.03$  and 2.18 g C m<sup>-2</sup> d<sup>-1</sup> under warming ( $T = 20$  °C) when  
 778 acclimation is considered (w/ Acclimation) or not considered (w/o Acclimation), which means a 8.2%  
 779 reduction in  $R_h$  due to acclimation. 95% CI denotes the 95% confidence interval. (b) Acclimation in  $R_h$   
 780 when the uncertainties in intrinsic  $Q_{10}$  are considered. Different letters for  $R_h$  indicate significantly  
 781 differences between the scenarios based on the Kruskal-Wallis test at a significance level of 0.05. The  
 782 acclimation (%) is quantified by the difference in  $R_h$  between warming w/o Acclimation and w/ Acclimation  
 783 as a percentage of the baseline  $R_h$  under control (see Methods Eq.8).  
 784
